# Supplementary material for: Systems Metabolic Alteration in a Semi-Dwarf Rice Mutant Induced by OsCYP96B4 Gene Mutation
Source: PubMed Central journal article supplement (PMC7139402; doi:10.3390/ijms21061924), 2020-03-11
Supplement: ijms-21-01924-s001.pdf [file ijms-21-01924-s001.pdf]

Supporting Information:

Table 1. <sup>1</sup>H and <sup>13</sup>C NMR assignment for metabolites in rice plant extracts.

| No. | metabolites             | moieties                                     | $\delta^1\text{H}$   | $\delta^{13}\text{C}$ |
|-----|-------------------------|----------------------------------------------|----------------------|-----------------------|
| 1   | isoleucine              | $\delta\text{CH}_3$                          | 0.94(t) <sup>a</sup> | 11.8                  |
|     |                         | $\gamma'\text{CH}_3$                         | 1.02(d)              | 15.3                  |
|     |                         | half $\gamma\text{CH}_2$                     | 1.27(m)              | 24.7                  |
|     |                         | half $\gamma\text{CH}_2$                     | 1.48(m)              | 24.7                  |
|     |                         | $\beta\text{CH}$                             | 1.98(m)              | 36.0                  |
|     |                         | $\alpha\text{CH}$                            | 3.68(d)              | 60.0                  |
| 2   | leucine                 | $\delta'\text{CH}_3$                         | 0.96(d)              | 21.7                  |
|     |                         | $\delta\text{CH}_3$                          | 0.97(d)              | 22.6                  |
|     |                         | $\gamma\text{CH}$                            | 1.70(m)              | 24.3                  |
|     |                         | $\beta\text{CH}_2$                           | 1.74(m)              | 40.2                  |
|     |                         | $\alpha\text{CH}$                            | 3.74(t)              | 54.0                  |
| 3   | valine                  | $\gamma'\text{CH}_3$                         | 1.00(d)              | 17.3                  |
|     |                         | $\gamma\text{CH}_3$                          | 1.05(d)              | 18.5                  |
|     |                         | $\beta\text{CH}$                             | 2.28(m)              | 29.5                  |
|     |                         | $\alpha\text{CH}$                            | 3.62(d)              | 60.8                  |
| 4   | lipid                   | $\text{CH}_2\text{CH}_2\text{CH}_2\text{CO}$ | 1.30(m)              | 29.0                  |
|     |                         | $\text{CH}_2\text{CH}_2\text{CO}$            | 1.54(m)              | 26.4                  |
|     |                         | $\text{CH}_2\text{CO}$                       | 2.17(m)              | 38.3                  |
| 5   | threonine               | $\gamma\text{CH}_3$                          | 1.34(d)              | 20.2                  |
|     |                         | $\alpha\text{CH}$                            | 3.60(d)              | 61.1                  |
|     |                         | $\beta\text{CH}$                             | 4.26(m)              | 66.6                  |
| 6   | lysine                  | $\gamma\text{CH}_2$                          | 1.46(m)              | 22.1                  |
|     |                         | $\delta\text{CH}_2$                          | 1.73(m)              | 27.1                  |
|     |                         | $\beta\text{CH}_2$                           | 1.90(m)              | 30.4                  |
|     |                         | $\epsilon\text{CH}_2$                        | 3.03(t)              | 40.0                  |
|     |                         | $\alpha\text{CH}$                            | 3.76(t)              | 55.4                  |
| 7   | alanine                 | $\beta\text{CH}_3$                           | 1.49(d)              | 16.8                  |
|     |                         | $\alpha\text{CH}$                            | 3.79(q)              | 51.2                  |
| 8   | arginine                | half $\gamma\text{CH}_2$                     | 1.66(m)              | 24.6                  |
|     |                         | half $\gamma\text{CH}_2$                     | 1.74(m)              | 24.6                  |
|     |                         | $\beta\text{CH}_2$                           | 1.93(m)              | 28.3                  |
|     |                         | $\delta\text{CH}_2$                          | 3.25(t)              | 41.1                  |
|     |                         | $\alpha\text{CH}$                            | 3.77(#)              | 55.2                  |
| 9   | $\gamma$ -aminobutyrate | $\beta\text{CH}_2$                           | 1.91(qu)             | 24.4                  |
|     |                         | $\alpha\text{CH}_2$                          | 2.30(t)              | 35.0                  |

| No. | metabolites       | moieties                  | $\delta^1\text{H}$ | $\delta^{13}\text{C}$ |
|-----|-------------------|---------------------------|--------------------|-----------------------|
|     |                   | $\gamma\text{CH}_2$       | 3.02(t)            | 40.0                  |
| 10  | glutamate         | half $\beta\text{CH}_2$   | 2.07(m)            | 27.7                  |
|     |                   | half $\beta\text{CH}_2$   | 2.14(m)            | 27.7                  |
|     |                   | $\gamma\text{CH}_2$       | 2.36(m)            | 34.2                  |
|     |                   | $\alpha\text{CH}$         | 3.77(t)            | 55.3                  |
| 11  | glutamine         | $\beta\text{CH}_2$        | 2.14(m)            | 27.1                  |
|     |                   | $\gamma\text{CH}_2$       | 2.46(m)            | 31.6                  |
|     |                   | $\alpha\text{CH}$         | 3.78(t)            | 54.7                  |
| 12  | malate            | half $\text{CH}_2$        | 2.38(dd)           | 43.3                  |
|     |                   | half $\text{CH}_2$        | 2.68(dd)           | 43.3                  |
|     |                   | CH                        | 4.30(dd)           | 71.0                  |
| 13  | succinate         | CH                        | 2.41(s)            | 34.7                  |
| 14  | 2-oxoglutarate    | $\beta\text{CH}_2$        | 2.45(t)            | #                     |
|     |                   | $\gamma\text{CH}_2$       | 3.01(t)            | #                     |
| 15  | citrate           | half $\text{CH}_2$        | 2.54(d)            | 46.0                  |
|     |                   | half $\text{CH}_2$        | 2.67(d)            | 46.0                  |
| 16  | methylamine       | $\text{CH}_3$             | 2.61(s)            | 25.6                  |
| 17  | aspartate         | half $\beta\text{CH}_2$   | 2.69(dd)           | 37.3                  |
|     |                   | half $\beta\text{CH}_2$   | 2.82(dd)           | 37.3                  |
|     |                   | $\alpha\text{CH}$         | 3.90(dd)           | 52.5                  |
| 18  | asparagine        | half $\beta\text{CH}_2$   | 2.87(dd)           | 35.3                  |
|     |                   | half $\beta\text{CH}_2$   | 2.96(dd)           | 35.3                  |
|     |                   | $\alpha\text{CH}$         | 4.01(dd)           | 51.9                  |
| 19  | ethanolamine      | $\text{CH}_2\text{NH}_2$  | 3.15(t)            | 42.1                  |
|     |                   | $\text{CH}_2\text{OH}$    | 3.84(t)            | 58.1                  |
| 20  | choline           | $\text{N}(\text{CH}_3)_3$ | 3.21(s)            | 54.5                  |
|     |                   | $\text{NCH}_2$            | 3.53(m)            | 68.1                  |
|     |                   | $\text{OCH}_2$            | 4.07(m)            | 56.3                  |
| 21  | phosphocholine    | $\text{N}(\text{CH}_3)_3$ | 3.23(s)            | 54.7                  |
|     |                   | $\text{NCH}_2$            | 3.60(m)            | 67.1                  |
|     |                   | $\text{OCH}_2$            | 4.18(m)            | 58.8                  |
| 22  | $\beta$ -glucose  | 1-CH                      | 4.65(d)            | 96.6                  |
|     |                   | 2-CH                      | 3.26(dd)           | 74.8                  |
|     |                   | 3-CH                      | 3.50(t)            | 76.4                  |
|     |                   | 4-CH                      | 3.41(dd)           | 70.2                  |
|     |                   | 5-CH                      | 3.47(#)            | 76.6                  |
|     |                   | half 6- $\text{CH}_2$     | 3.73(dd)           | 61.4                  |
|     |                   | half 6- $\text{CH}_2$     | 3.91(dd)           | 61.4                  |
| 23  | $\alpha$ -glucose | 1-CH                      | 5.25(d)            | 92.7                  |
|     |                   | 2-CH                      | 3.55(dd)           | 72.0                  |

| No. | metabolites                                              | moieties               | $\delta^1\text{H}$ | $\delta^{13}\text{C}$ |
|-----|----------------------------------------------------------|------------------------|--------------------|-----------------------|
|     |                                                          | 3-CH                   | 3.72(dd)           | 73.4                  |
|     |                                                          | 4-CH                   | 3.43(dd)           | 70.2                  |
|     |                                                          | 5-CH                   | 3.83(m)            | 72.7                  |
|     |                                                          | half 6-CH <sub>2</sub> | 3.77(#)            | 61.1                  |
|     |                                                          | half 6-CH <sub>2</sub> | 3.85(#)            | 61.1                  |
| 24  | methanol                                                 | CH <sub>3</sub>        | 3.36(s)            | 49.6                  |
| 25  | mono-methyl phosphate                                    | CH <sub>3</sub>        | 3.49(d)            | 52.2                  |
| 26  | sucrose                                                  | 1-CH (fructose)        | 3.69(d)            | 61.9                  |
|     |                                                          | 6-CH (fructose)        | 3.83(m)            | 63.1                  |
|     |                                                          | 5-CH (fructose)        | 3.91(m)            | 82.0                  |
|     |                                                          | 4-CH (fructose)        | 4.06(t)            | 74.7                  |
|     |                                                          | 3-CH (fructose)        | 4.23(d)            | 77.1                  |
|     |                                                          | 2-C (fructose)         |                    | 104.3                 |
|     |                                                          | 4-CH (glucose)         | 3.49(dd)           | 69.8                  |
|     |                                                          | 2-CH (glucose)         | 3.57(dd)           | 71.7                  |
|     |                                                          | 3-CH (glucose)         | 3.78(t)            | 73.1                  |
|     |                                                          | 6-CH (glucose)         | 3.83(m)            | 60.8                  |
|     |                                                          | 5-CH (glucose)         | 3.85(m)            | 73.0                  |
|     |                                                          | 1-CH (glucose)         | 5.42(d)            | 92.9                  |
| 27  | uridine                                                  | 2-CH (ribose)          | 4.35(dd)           | #                     |
|     |                                                          | 5-CH (ring)            | 5.91(d)            | #                     |
|     |                                                          | 1-CH (ribose)          | 5.92(d)            | #                     |
|     |                                                          | 6-CH (ring)            | 7.87(d)            | #                     |
| 28  | uridine 5'-monophosphate (UMP)                           | 2-CH (ribose)          | 4.41(#)            | #                     |
|     |                                                          | 5-CH (ring)            | 5.99(d)            | #                     |
|     |                                                          | 1-CH (ribose)          | 6.00(d)            | #                     |
|     |                                                          | 6-CH (ring)            | 8.10(d)            | #                     |
| 29  | allantoin                                                | CH                     | 5.39               | 63.9                  |
| 30  | uridine diphosphate<br>glucuronic acid (UDP glucuronate) |                        | 5.62(t)            | 108.0                 |
| 31  | adenosine                                                | 3-CH (ribose)          | 4.45(#)            | #                     |
|     |                                                          | 1-CH (ribose)          | 6.08(d)            | #                     |
|     |                                                          | 8-CH (ring)            | 8.26(s)            | #                     |
|     |                                                          | 2-CH (ring)            | 8.35(s)            | #                     |
| 32  | adenosine monophosphate (AMP)                            | 3-CH (ribose)          | 4.53(#)            | #                     |
|     |                                                          | 1-CH (ribose)          | 6.14(d)            | 87.5                  |
|     |                                                          | 8-CH (ring)            | 8.27(s)            | 153.2                 |
|     |                                                          | 2-CH (ring)            | 8.61(s)            | 140.5                 |
| 33  | fumarate                                                 | CH                     | 6.53(s)            | #                     |
| 34  | tyrosine                                                 | 3,5-CH (ring)          | 6.91(d)            | 116.4                 |
|     |                                                          | 2,6-CH (ring)          | 7.20(d)            | 131.5                 |
|     |                                                          | 4-C (ring)             |                    | 155.8                 |

| No. | metabolites                                  | moieties                            | $\delta^1\text{H}$        | $\delta^{13}\text{C}$ |    |
|-----|----------------------------------------------|-------------------------------------|---------------------------|-----------------------|----|
| 35  | histidine                                    | 4-CH (ring)                         | 7.10(s)                   | 117.8                 |    |
|     |                                              | 2-CH (ring)                         | 7.89(s)                   | 136.4                 |    |
|     |                                              | 5-C (ring)                          |                           | 131.4                 |    |
| 36  | tryptophan                                   | 5-CH (ring)                         | 7.20(t)                   | 120.0                 |    |
|     |                                              | 6-CH (ring)                         | 7.28(t)                   | 122.6                 |    |
|     |                                              | 2-CH (ring)                         | 7.33(s)                   | 125.7                 |    |
|     |                                              | 7-CH (ring)                         | 7.54(d)                   | 112.5                 |    |
|     |                                              | 4-CH (ring)                         | 7.73(d)                   | 119.1                 |    |
|     |                                              | 3-C (ring)                          |                           | 108.1                 |    |
|     |                                              | 8-C (ring)                          |                           | 137.0                 |    |
| 37  | phenylalanine                                | 2,6-CH (ring)                       | 7.34(m)                   | 129.9                 |    |
|     |                                              | 4-CH (ring)                         | 7.39(m)                   | 128.4                 |    |
|     |                                              | 3,5-CH (ring)                       | 7.43(m)                   | 129.6                 |    |
|     |                                              | 1-C (ring)                          |                           | 135.8                 |    |
| 38  | N-methylnicotinate<br>(NMNA)                 | (trigonelline,<br>CH <sub>3</sub> ) | 4.44(s)                   | 48.8                  |    |
|     |                                              |                                     | 5-CH                      | 8.09(#)               | #  |
|     |                                              |                                     | 4-CH                      | 8.84(#)               | #  |
|     |                                              |                                     | 6-CH                      | 8.85(#)               | #  |
|     |                                              |                                     | 2-CH                      | 9.13(s)               | #  |
| 39  | nicotinamide<br>(nicotinamide ribotide, NMN) | mononucleotide                      | 5-CH                      | 8.33(t)               | #  |
|     |                                              |                                     | 4-CH                      | 9.00(d)               | #  |
|     |                                              |                                     | 6-CH                      | 9.35(d)               | #  |
|     |                                              |                                     | 2-CH                      | 9.59(s)               | #  |
|     |                                              |                                     | 40                        | formate               | CH |
| 41  | $\beta$ -D-fructopyranose                    | 1-CH                                | #                         | #                     |    |
|     |                                              | 2-C                                 |                           | 98.3                  |    |
|     |                                              | 3-CH                                | #                         | #                     |    |
|     |                                              | 4-CH                                | #                         | #                     |    |
|     |                                              | 5-CH                                | #                         | #                     |    |
|     |                                              | half 6-CH <sub>2</sub>              | 3.72(#)                   | #                     |    |
|     |                                              | half 6-CH <sub>2</sub>              | 4.03(dd)                  | 64.0                  |    |
|     |                                              | 42                                  | $\beta$ -D-fructofuranose | 1-CH                  | #  |
|     |                                              | 2-C                                 |                           | 104.7                 |    |
|     |                                              | 3-CH                                | 4.12(d)                   | 76.2                  |    |
|     |                                              | 4-CH                                | 4.12(d)                   | 75.1                  |    |
|     |                                              | 5-CH                                | 3.85(#)                   | #                     |    |
|     |                                              | half 6-CH <sub>2</sub>              | 3.69(#)                   | #                     |    |
|     |                                              | half 6-CH <sub>2</sub>              | 3.82(#)                   | #                     |    |

<sup>a</sup> multiplicity for <sup>1</sup>H resonances: s, singlet; d, doublet; t, triplet; q, quartet; qu, quintet; m, multiplet; dd, doublet of doublets; #, multiplicity can't be determined. <sup>b</sup> #: signals were not determined.

**Table 2.** OPLS-DA loadings correlation coefficients.

| Metabolite (chemical shift)                                   | Keys | Coefficients (r) |            |           |
|---------------------------------------------------------------|------|------------------|------------|-----------|
|                                                               |      | M vs. WT         | ECE vs. WT | ECE vs. M |
| <b>Amino acids &amp; derivatives</b>                          |      |                  |            |           |
| $\gamma$ -aminobutyrate (GABA, $\delta$ 2.30)                 | 9    | 0.850            | 0.888      | 0.689     |
| glutamate ( $\delta$ 2.36)                                    | 10   | -0.743           | -0.807     |           |
| glutamine ( $\delta$ 2.46)                                    | 11   |                  | 0.749      | 0.789     |
| isoleucine ( $\delta$ 1.02)                                   | 1    | -0.771           | -0.753     |           |
| leucine ( $\delta$ 0.97)                                      | 2    | -0.767           |            |           |
| valine ( $\delta$ 1.05)                                       | 3    | -0.756           | -0.653     |           |
| ethanolamine ( $\delta$ 3.15)                                 | 19   | -0.805           | -0.874     | -0.775    |
| choline ( $\delta$ 3.21)                                      | 20   | 0.611            |            |           |
| phosphocholine ( $\delta$ 3.23)                               | 21   |                  | -0.882     | -0.787    |
| threonine ( $\delta$ 1.34)                                    | 5    | -0.768           | -0.786     |           |
| aspartate ( $\delta$ 2.69)                                    | 17   | -0.835           | -0.760     |           |
| asparagine ( $\delta$ 2.87)                                   | 18   |                  | -0.704     | -0.674    |
| alanine ( $\delta$ 1.49)                                      | 7    |                  | 0.829      | 0.789     |
| arginine ( $\delta$ 1.66)                                     | 8    |                  | -0.779     | -0.747    |
| histidine ( $\delta$ 7.10)                                    | 35   | -0.803           | -0.890     | -0.771    |
| phenylalanine ( $\delta$ 7.43)                                | 37   | -0.837           | -0.864     | -0.732    |
| tryptophan ( $\delta$ 7.28)                                   | 36   | -0.742           | -0.872     | -0.757    |
| tyrosine ( $\delta$ 6.91)                                     | 34   | -0.940           | -0.927     | -0.821    |
| <b>Carbohydrate metabolites &amp; TCA cycle intermediates</b> |      |                  |            |           |
| sucrose ( $\delta$ 5.42)                                      | 26   |                  | -0.878     | -0.916    |
| glucose ( $\delta$ 5.25)                                      | 23   | 0.847            | 0.848      | 0.768     |
| fructose ( $\delta$ 4.12)                                     | 42   | 0.767            | 0.803      | 0.743     |
| succinate ( $\delta$ 2.41)                                    | 13   | -0.795           |            | 0.712     |
| fumarate ( $\delta$ 6.53)                                     | 33   | -0.843           |            | 0.823     |
| malate ( $\delta$ 4.30)                                       | 12   | -0.863           |            | 0.692     |
| citrate ( $\delta$ 2.54)                                      | 15   | -0.821           |            |           |
| <b>Nucleotide metabolites</b>                                 |      |                  |            |           |
| adenosine ( $\delta$ 8.35)                                    | 31   |                  | 0.712      |           |
| adenosine monophosphate (AMP) ( $\delta$ 8.61)                | 32   |                  | -0.714     |           |
| uridine ( $\delta$ 5.91)                                      | 27   | 0.714            | -0.632     | -0.662    |
| <b>Other metabolites</b>                                      |      |                  |            |           |
| lipid ( $\delta$ 1.30)                                        | 4    | 0.860            | 0.838      | 0.651     |
| N-methylnicotinate (trigonelline, NMNA, $\delta$ 9.13)        | 38   | 0.842            | 0.766      |           |
| formate ( $\delta$ 8.46)                                      | 40   |                  | 0.848      | 0.813     |
| mono-methyl phosphate ( $\delta$ 3.49)                        | 25   | 0.804            | -0.712     | -0.903    |

WT, the wild type; M, the *oscyp96b4* semi-dwarf mutant; ECE, the *OsCYP96B4* ectopic expression.

**Table 3.** Primers for quantitative real-time PCR analysis on selected genes.

| Accession      | Gene Name                                                | Primers (5' -3' )           |                              | Product length (bp) |
|----------------|----------------------------------------------------------|-----------------------------|------------------------------|---------------------|
|                |                                                          | Forward Sequence            | Reverse Sequence             |                     |
| LOC_Os02g14110 | aspartate aminotransferase, AAT                          | AGAGGCGTTTCTTGCCAAATT       | CCATCAGTCCTGCGAAATCA         | 150                 |
| LOC_Os03g28330 | sucrose synthase 1, SUS1                                 | TTGTGCAGCCCGCTTTCTAC        | CACCCTGGTATGGGTCAATGT        | 150                 |
| LOC_Os05g48200 | glutamate synthase 2, GOGAT2                             | GTCACGAAGGACGCAGGTTT        | CCAGCCGAGGACGGTATG           | 150                 |
| LOC_Os01g52230 | phosphoethanolamine/phosphocholine phosphatase, PHOSPHO1 | CGGCCTCACGGGTTACTTCT        | CTGGCCCTTGCACATGTTGG         | 154                 |
| LOC_Os02g50240 | glutamine synthetase, GS                                 | GGAACGATGGTGGCTACGA         | CTCCCCAGCTGAAGGTGTTG         | 150                 |
| LOC_Os04g42520 | adenine phosphoribosyltransferase, APRT                  | ACCGTTGCGCAAACCTAAGA        | CCACCGTTGCAACTAAATCA         | 150                 |
| LOC_Os04g46560 | malate dehydrogenase, MDH                                | CTTCCAGCGTCTGGCAAAT         | CGGCTGGTCGGCTCCTA            | 150                 |
| LOC_Os08g09200 | Aconitase, ACO                                           | ATGGAGAAGTTGGACCCAAGA<br>C  | CAGCCCAGTCACGAGAACTG         | 150                 |
| LOC_Os09g12290 | aspartate kinase, AK                                     | GGCTCGAGCTTTCCGATATTC       | GCACTTCTCCTGCAGCTTCAG        | 150                 |
| LOC_Os09g20440 | succinate dehydrogenase, SDH                             | CCGCGTCGAAGTTGCTTAC         | ACCAACCCAACTGCATGGA          | 150                 |
| LOC_Os10g25140 | alanine transaminase, ALT                                | TCGTGGCGCAACTCTGTAC         | CCAGTAGGGTTTCCCGGATTT        | 150                 |
| LOC_Os01g09460 | hexokinase-8, HXK8                                       | AGCATGTCGTCAACTCTGAATC<br>C | TCTTGCCGTTTGGCATGTC          | 150                 |
| LOC_Os02g16630 | phosphoribosylanthranilate isomerase, PRAI               | AATGCCAATGACGACGGAAA        | CCCATTCTTGCTTCGAACAGA        | 150                 |
| LOC_Os02g19970 | tyrosine aminotransferase, TAT                           | TCCAAGCGATCGAAGTCATG        | CCCAGCCTCTCTGGAATG           | 150                 |
| LOC_Os03g09910 | LL-diaminopimelate aminotransferase, LL-DAP-AT           | TGCTGCGCAATCCAAACAT         | CGATGCTTGGTATGGGTTCA         | 150                 |
| LOC_Os03g50480 | phosphoglucomutase, PGM                                  | GTGATGCTGATCGCAACATGA       | CAGCTGATGTGGGCATGCT          | 150                 |
| LOC_Os03g50880 | anthranilate synthase beta subunit 2, ASB2               | GCCCTGGCACACCTCAAG          | GCACAACCTCCATAAGGAGAAC<br>GA | 150                 |

|                |                                                                      |                                               |                                              |            |
|----------------|----------------------------------------------------------------------|-----------------------------------------------|----------------------------------------------|------------|
| LOC_Os04g37500 | glutamate decarboxylase 4, GAD4                                      | CCACAAGTACGGGCTCGTCTA<br>C                    | ATCTGACTGGACCCTTTGGAGA<br>A                  | 150        |
| LOC_Os04g40950 | glyceraldehyde 3-phosphate<br>dehydrogenase, GAPDH                   | TCACCTGAAGGGTGGTGCTAA                         | AGTGGAGCAAGGCAGTTGGT                         | 150        |
| LOC_Os04g58390 | allantoinase, ALN                                                    | CAGGCGTCTTAGGGCTCAAG<br>CCCTGTACCAGAAGACCAAGG | GAACATCGGGTATGCGTTCTG<br>GCGCATCTCTTGCCAAGGT | 150<br>150 |
| LOC_Os05g33380 | fructose-bisphosphate aldolase, FBA                                  | A                                             |                                              |            |
| LOC_Os05g40420 | 2,3-bisphosphoglycerate-independent<br>phosphoglycerate mutase, iPGM | CACTTGGTGCTGGTCGGATT                          | CGTCGCTCAACAACCCAATA                         | 150        |
| LOC_Os08g23150 | indole-3-glycerol phosphate synthase,<br>IGPS                        | AGCCTTCAAGCGCAATGGTA                          | TCGGTCAAGATGCTCAAGCA                         | 150        |
| LOC_Os08g32870 | betaine aldehyde dehydrogenase 2,<br>BADH2                           | GAATCCTTGGACAAAAGGCAA<br>A                    | GGCAGGAGCTACCTTCCATGT                        | 150        |
| LOC_Os03g50885 | actin-1, ACT1                                                        | CCAAGGCCAATCGTGAGAAGA                         | AATCAGTGAGATCACGCCAG                         | 228        |

---

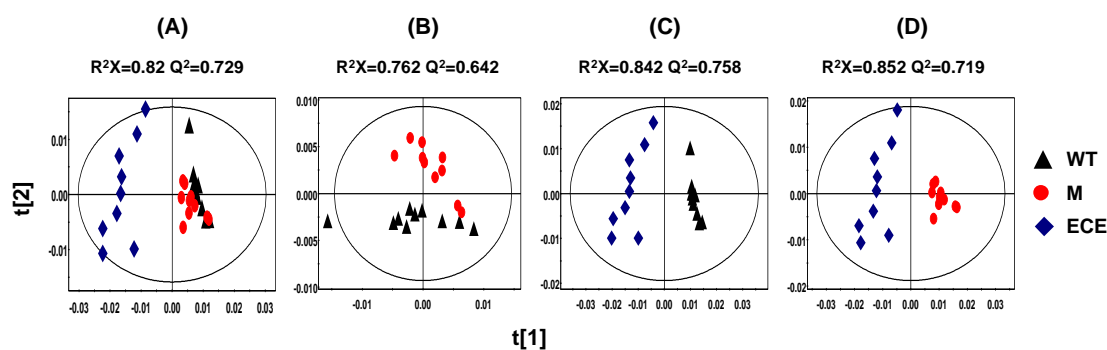

**Figure S1.** PCA scores plots derived from  $^1\text{H}$  NMR spectra of rice plant extracts from different groups. (A) the wild type (WT, ▲), the *oscyp96b4* semi-dwarf mutant (M, ●), and the *OsCYP96B4* ectopic expression (ECE, ◆) rice lines, the first and second principal component contains 64.3% and 17.7% of the variance respectively. (B) the wild type (WT, ▲) and the *oscyp96b4* semi-dwarf mutant (M, ●) rice lines, the first and second principal component contains 54.2% and 22.0% of the variance respectively. (C) the wild type (WT, ▲) and the *OsCYP96B4* ectopic expression (ECE, ◆) rice lines, the first and second principal component contains 65.2% and 19.0% of the variance respectively. (D) the *oscyp96b4* semi-dwarf mutant (M, ●) and the *OsCYP96B4* ectopic expression (ECE, ◆) rice lines, the first and second principal component contains 64.7% and 20.5% of the variance respectively.

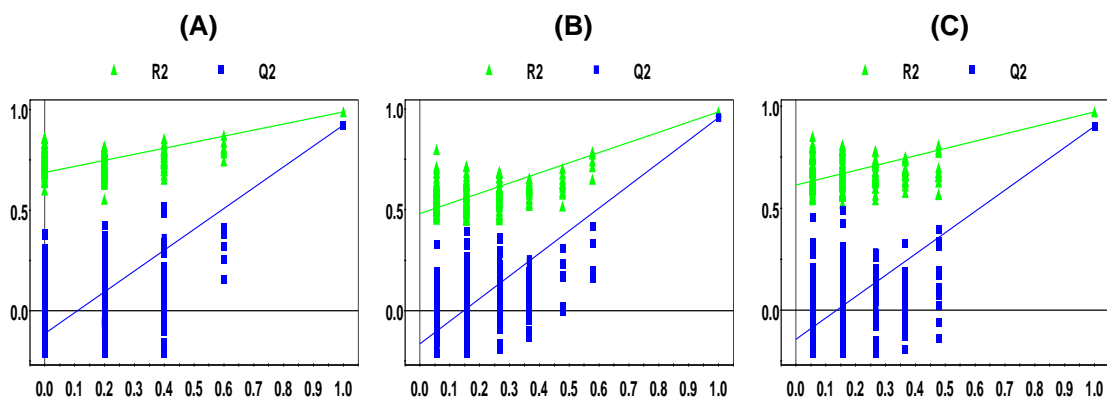

**Figure S2.** Permutation test results (with 200 permutations) for PLS-DA models (with 2 components) derived from  $^1\text{H}$  NMR spectra of rice plant extracts from different groups. (A) the wild type (WT) and the *oscyp96b4* semi-dwarf mutant (M) rice lines, intercepts:  $R^2 = (0.0, 0.688)$ ,  $Q^2 = (0.0, -0.114)$ ; (B) the wild type (WT) and the *OsCYP96B4* ectopic expression (ECE) rice lines, intercepts:  $R^2 = (0.0, 0.481)$ ,  $Q^2 = (0.0, -0.164)$ ; (C) the *oscyp96b4* semi-dwarf mutant (M) and the *OsCYP96B4* ectopic expression (ECE) rice lines, intercepts:  $R^2 = (0.0, 0.613)$ ,  $Q^2 = (0.0, -0.144)$ .



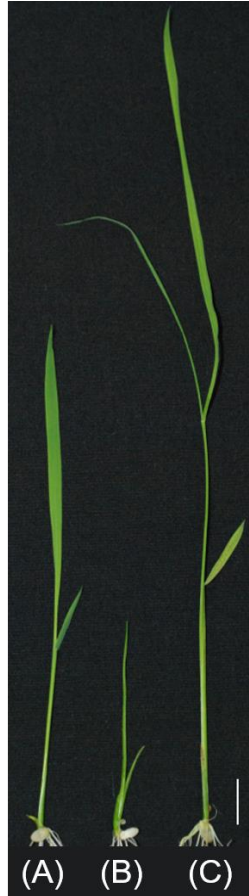

**Figure S3.** Representative phenotypes of the 2-week-old (A) *oscyp96b4* semi-dwarf mutant (M), (B) *OsCYP96B4* ectopic expression (ECE) and (C) wild-type (WT) rice plants. Scale bar = 1 cm.
